# Supplementary material for: SNPs for Parentage Testing and Traceability in Globally Diverse Breeds of Sheep
Source: PLoS One. 2014 Apr 16;9(4):e94851. doi: 10.1371/journal.pone.0094851 (PMC3989260; doi:10.1371/journal.pone.0094851)
Supplement: Table S5 — Consensus reference genotypes for 96 U.S. sheep (MSDPv2.4) and 163 parentage SNPs. (XLSX) [file pone.0094851.s006.xlsx]

## Sheet: T S5
Table S5. Consensus reference genotypes for 96 U.S. sheep (MSDPv2.4) and 163 parentage SNPs.
		DU299578	DU518561	DU202534	s23738	OAR1_46249324	DU521806	OAR1_86712802	DU271929	OAR1_130854923	OAR1_172310048	DU463771	DU191809	DU223430	OAR1_227032731	s24804	s30254	DU348827	DU342117	DU383209	DU502334	DU247686	DU469454	DU442796	DU425907	DU492516	s51266	250506CS3901012300001	DU266660	OAR2_141253696	250506CS3900218700001	OAR2_177151313	OAR2_198392100	DU480434	s13271	DU260201	s40679	DU200069	DU360304	DU231007	s19512	DU225323	OAR3_117378944	DU511583	OAR3_145344922	OAR3_169414477	CL635241	DU408817	OAR3_238210924
Breed	ID	gtaga-[Y]-aagag	tcaga-[R]-tgRgg	aaagc-[R]-gtaac	ttagt-[K]-ctttt	attct-[R]-aaaga	gtgta-[Y]-gagct	agagg-[R]-gagat	aggac-[M]-ggttR	tctgc-[R]-tctca	gtaca-[Y]-ggtta	accca-[Y]-gtatt	ctcct-[R]-gaagc	cacta-[W]-ggtgt	caccc-[R]-ttgcc	ctctt-[R]-ctgac	gatgg-[R]-taaga	caaat-[Y]-gacac	actaa-[Y]-tttct	catgt-[R]-gagct	gaaat-[Y]-ggaaa	attgY-[R]-tgcac	ggcag-[Y]-tgtgt	ctctg-[R]-gctat	ccttt-[Y]-ctagg	ctttt-[W]-attcc	ctatc-[M]-gttga	ctaga-[Y]-aggct	gaagc-[Y]-aacaa	ctgac-[Y]-tgtct	Rtctc-[Y]-cccta	caRtt-[Y]-ggttc	atgat-[Y]-cagaa	gctgt-[R]-aactt	gatac-[Y]-attta	taccc-[R]-cacga	gtgct-[Y]-gtctg	gctca-[R]-tgaat	aggag-[W]-gtatR	ttaac-[Y]-cacag	cttga-[Y]-ttggt	gctac-[Y]-aatat	agctt-[R]-gccat	cttca-[Y]-gaaag	atgtc-[R]-ttttc	actat-[Y]-tgatt	gacct-[Y]-gatac	ctggg-[R]-agagt	gggat-[Y]-agttg
Rambouillet	199735001	T	A	G	G	G	Y	A	C	G	Y	T	Y	W	A	G	R	C	Y	A	T	Y	T	G	Y	W	A	T	Y	Y	T	C	G	G	T	R	Y	G	W	C	Y	Y	G	C	R	Y	T	G	T
Texel	199906022	Y	R	G	K	A	T	A	M	A	C	T	C	W	R	R	A	C	Y	A	T	C	C	A	Y	W	M	Y	C	Y	C	Y	G	G	Y	A	Y	G	W	C	Y	T	G	T	R	T	Y	G	T
Suffolk	199910003	C	A	R	K	R	T	R	A	A	C	C	C	W	G	R	R	Y	C	R	C	C	Y	A	Y	W	M	T	Y	T	C	Y	T	G	Y	A	C	R	W	T	Y	Y	R	T	R	Y	C	G	T
Dorper	199911904	T	A	A	T	G	Y	R	A	A	Y	Y	C	T	R	G	G	Y	Y	R	C	Y	T	R	T	W	C	T	Y	Y	C	C	T	R	Y	R	C	G	A	C	T	C	G	C	G	Y	Y	G	T
Dorset	199912068	C	A	A	G	A	C	R	M	R	T	Y	T	W	A	R	A	Y	C	G	Y	C	Y	G	Y	A	M	T	Y	Y	T	C	K	G	C	R	C	G	W	T	C	Y	R	C	A	Y	C	R	C
Dorset	199912079	Y	R	A	K	R	Y	G	C	G	T	T	T	T	A	A	G	T	T	G	Y	C	Y	G	C	A	A	T	C	Y	T	Y	T	R	T	A	C	R	W	T	C	C	G	Y	G	T	C	G	C
Romanov	199914218	Y	R	R	G	A	C	A	M	G	T	Y	Y	W	G	R	R	T	Y	G	C	T	Y	R	C	W	C	T	C	T	C	C	T	A	T	G	Y	G	T	C	T	Y	R	T	A	C	C	G	T
Romanov	199914942	T	R	R	G	R	C	A	C	A	Y	T	C	A	A	G	G	C	T	G	Y	Y	T	G	T	W	M	C	Y	T	Y	Y	G	G	T	G	Y	G	W	Y	T	T	A	Y	R	Y	T	R	C
Finn	199916204	T	R	G	T	G	Y	R	M	R	Y	T	T	T	A	G	G	C	C	R	C	Y	Y	R	T	T	C	C	C	C	C	T	G	R	T	R	Y	R	T	Y	T	Y	A	T	R	T	T	G	Y
Rambouillet	199935902	Y	G	G	K	G	T	G	A	A	Y	C	Y	T	A	R	R	C	Y	A	T	T	Y	R	C	T	M	Y	C	T	Y	Y	G	G	C	R	C	A	T	T	C	T	G	Y	G	C	Y	R	Y
Rambouillet	199935923	Y	A	G	K	G	Y	A	C	R	Y	Y	C	A	R	A	R	C	Y	A	C	Y	C	R	Y	T	C	T	T	C	Y	Y	K	R	Y	R	Y	R	T	Y	Y	T	R	C	A	C	T	A	T
NavajoChurro	199950927	Y	A	G	G	R	T	R	A	A	Y	C	Y	W	A	R	R	Y	T	R	Y	Y	T	R	Y	W	A	C	Y	T	T	C	K	R	C	R	Y	G	W	C	T	Y	G	Y	A	Y	Y	G	T
Texel	200006024	T	G	R	T	R	Y	A	A	R	Y	Y	C	W	A	A	R	Y	C	G	Y	Y	Y	A	Y	W	M	T	C	Y	C	Y	T	R	T	A	T	R	A	Y	Y	T	R	C	A	T	T	G	Y
Texel	200006910	C	G	A	K	A	T	R	C	R	Y	C	Y	W	A	G	R	T	T	G	T	T	C	R	Y	A	M	Y	C	Y	C	C	G	G	Y	A	Y	R	W	Y	Y	C	R	C	A	T	Y	G	T
Katahdin	200008100	Y	R	G	T	G	T	A	M	R	Y	C	Y	T	A	A	R	Y	C	A	C	Y	T	A	Y	W	C	Y	T	T	Y	Y	K	G	Y	R	T	G	W	T	Y	C	A	Y	G	Y	Y	R	C
Katahdin	200008764	Y	A	A	K	G	Y	G	M	A	Y	C	T	T	A	A	R	C	T	R	C	Y	T	A	C	W	C	T	C	T	C	Y	K	R	Y	A	Y	R	T	Y	T	C	R	C	G	T	T	G	Y
Katahdin	200008947	C	A	R	G	G	T	R	M	A	C	C	T	T	R	R	G	T	Y	A	C	C	T	A	C	A	M	C	Y	T	T	C	K	R	T	R	Y	A	T	C	T	Y	R	C	G	C	Y	A	Y
WhiteDorper	200011259	T	A	G	T	A	T	A	A	G	Y	Y	Y	T	R	A	G	C	T	A	Y	Y	Y	R	T	A	A	T	C	Y	Y	Y	K	G	Y	R	C	G	W	Y	Y	Y	A	Y	G	T	Y	G	Y
WhiteDorper	200011900	T	A	A	G	G	C	R	A	R	T	Y	Y	T	A	R	R	C	T	R	C	C	T	A	T	A	C	Y	C	T	C	T	K	G	T	R	C	R	A	Y	Y	Y	A	C	R	T	C	G	C
Dorper	200011945	T	R	A	T	G	T	G	A	R	T	Y	C	W	R	R	G	C	Y	G	C	T	T	A	T	A	M	T	Y	Y	T	Y	T	R	Y	R	C	G	A	C	T	C	G	C	R	C	Y	A	Y
Dorset	200012903	C	R	A	K	A	Y	R	M	G	Y	T	T	A	A	R	R	Y	Y	G	Y	Y	Y	R	Y	A	A	Y	Y	T	T	T	T	G	Y	R	C	R	W	Y	C	Y	G	C	G	Y	C	G	T
Romanov	200014943	T	G	R	G	R	Y	R	A	A	C	T	Y	T	G	R	G	Y	C	G	Y	Y	Y	R	T	W	M	Y	T	T	C	C	K	G	Y	R	C	A	W	Y	T	T	A	Y	A	Y	T	R	T
Finn	200016002	T	R	R	K	R	C	A	A	A	Y	T	Y	T	A	G	R	C	C	G	Y	Y	Y	R	T	W	M	T	Y	T	C	Y	G	R	T	R	Y	A	W	T	Y	Y	R	T	R	Y	Y	G	Y
Finn	200016018	T	R	R	T	A	T	A	M	R	C	Y	T	T	G	R	A	C	C	A	Y	C	Y	R	T	A	C	T	C	C	C	C	K	G	T	R	Y	R	T	Y	Y	Y	R	T	A	T	Y	R	Y
Finn	200016129	T	R	R	T	R	C	R	M	A	C	T	Y	W	R	R	R	C	C	A	Y	T	C	R	T	T	M	T	Y	T	C	Y	T	G	T	R	C	G	T	Y	C	Y	A	Y	R	Y	Y	R	C
Finn	200016922	T	R	R	K	R	T	A	A	R	Y	T	T	W	R	A	A	C	T	R	Y	T	Y	R	T	T	C	Y	T	Y	C	Y	G	G	C	R	Y	G	T	Y	Y	C	G	T	G	C	C	R	C
Finn	200016940	Y	A	R	K	R	Y	A	A	R	Y	Y	Y	W	A	R	G	Y	Y	R	C	Y	T	A	T	T	A	Y	C	C	Y	Y	T	G	Y	G	C	R	T	Y	Y	Y	G	T	R	C	Y	R	Y
Rambouillet	200035920	C	A	G	G	G	Y	A	C	A	Y	Y	T	W	R	R	G	Y	Y	R	T	Y	T	R	Y	W	A	T	T	T	T	Y	G	A	C	R	T	R	W	T	C	T	G	T	G	C	Y	G	T
Rambouillet	200035921	Y	R	R	G	R	Y	A	C	R	Y	T	T	W	R	G	G	C	Y	A	Y	T	Y	R	T	T	A	T	C	T	Y	Y	K	R	Y	R	Y	A	W	T	C	Y	G	T	G	C	T	G	T
Rambouillet	200035922	Y	A	G	G	G	T	R	A	A	C	C	Y	W	G	A	G	C	C	R	Y	T	Y	G	Y	T	M	T	T	Y	C	T	G	G	C	R	T	G	T	Y	Y	Y	G	T	G	Y	Y	G	T
Rambouillet	200035924	C	G	G	G	G	Y	A	A	A	C	T	Y	W	A	R	G	Y	T	G	C	Y	T	A	T	T	A	Y	T	T	C	Y	G	R	Y	G	C	R	A	Y	C	T	R	C	G	Y	Y	A	Y
Composite	200103335	Y	A	R	K	A	T	R	A	G	Y	C	C	W	R	A	A	Y	T	G	T	Y	Y	R	T	T	A	Y	Y	C	C	Y	T	G	T	A	T	R	W	Y	T	Y	R	Y	A	C	T	A	Y
Composite	200103367	T	A	A	K	G	T	A	M	R	T	Y	C	A	G	R	A	Y	T	R	Y	Y	C	G	C	W	A	T	Y	T	T	Y	G	R	Y	G	C	R	A	C	C	T	G	Y	R	Y	C	G	Y
Composite	200103459	Y	A	R	G	R	Y	R	M	R	Y	Y	C	A	G	A	A	C	Y	R	T	Y	C	G	T	T	A	T	Y	Y	Y	T	T	R	C	R	T	G	W	C	Y	C	G	Y	G	Y	Y	G	Y
Texel	200106931	Y	G	R	K	A	T	G	M	G	Y	T	T	A	R	R	R	Y	T	A	Y	Y	Y	R	Y	A	M	Y	C	C	Y	Y	T	A	T	A	T	G	W	C	Y	Y	G	C	A	C	T	G	C
Texel	200106932	C	G	G	K	A	T	G	M	R	Y	T	Y	W	A	G	G	T	T	G	Y	Y	C	R	Y	W	M	Y	C	Y	C	T	K	R	Y	A	C	G	W	Y	C	C	G	C	R	Y	T	G	Y
Katahdin	200108933	C	R	R	K	G	T	R	M	A	C	C	Y	T	G	A	G	Y	T	A	C	T	Y	A	Y	W	C	T	Y	Y	T	C	G	G	Y	R	Y	R	W	T	Y	C	A	C	A	Y	Y	R	Y
Katahdin	200108934	Y	R	R	G	G	T	G	C	A	C	C	Y	W	R	A	G	Y	Y	G	Y	T	Y	A	C	A	M	Y	Y	Y	T	Y	T	G	Y	R	Y	A	W	Y	Y	Y	G	Y	R	C	Y	A	Y
Katahdin	200108935	Y	A	R	K	G	T	R	M	A	Y	C	T	T	G	R	G	Y	Y	A	C	C	T	A	Y	W	C	C	C	T	Y	C	G	R	C	A	T	A	W	C	C	C	A	C	R	Y	T	A	Y
Katahdin	200108936	C	A	R	K	G	Y	A	C	A	C	Y	Y	T	R	R	R	Y	Y	R	C	Y	C	A	Y	A	M	Y	T	Y	C	C	K	A	C	R	Y	A	T	Y	Y	Y	A	C	R	Y	T	A	Y
Katahdin	200108938	T	A	R	G	G	Y	A	A	A	Y	Y	C	T	R	R	G	Y	Y	R	C	Y	Y	A	Y	W	M	Y	C	T	C	C	G	A	Y	A	Y	A	W	Y	C	C	R	C	A	T	Y	G	T
Dorper	200111910	C	R	R	T	G	Y	G	A	R	C	T	T	W	R	G	R	C	Y	G	C	T	T	R	T	W	C	T	Y	Y	Y	T	T	A	Y	R	C	R	W	T	T	Y	G	Y	R	Y	Y	R	Y
Dorper	200111912	T	A	R	K	G	Y	R	A	A	Y	Y	Y	T	R	R	A	C	Y	R	Y	Y	Y	A	Y	W	C	T	Y	Y	Y	Y	T	R	C	R	C	A	A	T	T	C	A	Y	A	T	Y	R	C
Dorper	200111916	Y	A	R	T	G	Y	R	A	R	Y	Y	T	T	R	R	G	Y	Y	G	Y	Y	Y	A	T	W	M	T	C	Y	Y	Y	T	A	Y	A	C	R	W	T	T	C	R	Y	G	Y	C	A	T
Dorper	200111917	T	A	G	T	G	Y	R	A	G	Y	Y	Y	T	A	G	R	C	T	A	C	Y	Y	R	T	T	C	T	T	Y	C	C	K	R	Y	R	Y	R	W	Y	Y	Y	G	Y	R	Y	Y	R	C
WhiteDorper	200111923	C	A	A	T	A	Y	R	A	R	Y	Y	Y	W	G	G	G	C	Y	R	C	C	T	R	T	A	C	T	Y	C	T	Y	K	R	T	A	Y	R	T	T	Y	C	R	C	A	Y	Y	R	Y
WhiteDorper	200111924	C	R	R	T	R	T	G	A	R	T	Y	T	T	R	G	A	Y	T	A	Y	C	T	A	T	W	A	T	Y	Y	T	C	G	G	C	R	Y	G	W	Y	Y	C	A	Y	R	Y	Y	R	Y
Dorset	200112907	C	R	R	G	G	C	R	M	A	Y	T	T	W	R	R	R	T	Y	R	T	Y	Y	A	C	A	M	T	T	Y	Y	T	G	G	C	G	C	A	W	Y	C	Y	G	T	A	Y	T	R	C
Finn	200116921	T	G	R	K	G	T	G	A	R	C	Y	Y	W	R	G	R	C	C	R	C	Y	Y	A	T	W	C	T	T	T	Y	T	K	R	Y	R	C	R	T	Y	C	Y	R	T	A	C	C	G	C
Finn	200116926	T	G	A	K	G	Y	R	M	R	C	Y	Y	A	A	G	R	C	C	R	Y	T	C	R	T	T	M	C	C	Y	C	C	K	R	Y	R	Y	A	T	T	Y	Y	A	Y	A	Y	Y	R	Y
Dorset	200117009	C	A	R	G	R	C	A	A	G	C	Y	Y	W	A	A	R	Y	C	G	Y	C	Y	R	Y	T	A	Y	C	T	Y	Y	G	G	Y	G	C	G	A	C	Y	Y	G	Y	R	T	C	R	Y
Dorset	200117016	T	R	R	T	A	C	R	M	G	T	T	T	T	A	R	A	T	C	G	Y	Y	Y	R	Y	A	A	T	Y	C	Y	Y	K	G	T	G	C	G	A	Y	Y	Y	A	Y	A	Y	C	A	C
Dorset	200117080	Y	R	A	T	A	C	A	M	G	T	T	T	T	A	A	A	Y	Y	G	Y	C	Y	R	Y	A	M	Y	Y	Y	T	C	G	G	Y	G	C	R	A	C	Y	Y	R	T	A	T	C	G	C
Romanov	200117137	T	R	A	K	R	C	A	M	A	C	Y	Y	A	R	R	R	C	Y	R	Y	Y	T	R	Y	W	C	Y	T	T	C	C	G	G	Y	R	Y	R	W	Y	T	T	R	T	A	C	C	A	T
Romanov	200117140	T	G	G	G	A	T	G	A	R	Y	Y	T	W	R	G	R	Y	Y	G	T	Y	C	R	T	W	C	Y	C	T	Y	C	K	R	C	G	Y	G	T	T	T	Y	A	T	A	T	C	R	T
Romanov	200117160	Y	G	A	K	A	T	A	C	A	C	Y	T	W	R	G	R	Y	C	G	C	T	Y	R	T	T	C	C	Y	T	C	C	G	R	T	G	C	R	W	Y	Y	T	A	T	A	Y	C	R	T
Suffolk	200117163	Y	R	G	G	A	Y	R	M	G	Y	Y	C	A	R	R	R	C	Y	R	T	T	Y	R	T	W	M	T	C	T	T	Y	K	R	C	A	Y	A	W	Y	C	Y	R	T	R	T	Y	G	T
Romanov	200117201	Y	G	R	K	A	Y	R	M	R	C	T	Y	T	G	R	R	Y	Y	G	Y	T	Y	R	T	T	M	Y	T	T	Y	C	K	R	Y	R	Y	R	W	T	T	T	A	Y	R	Y	C	G	T
Romanov	200117419	T	G	R	G	A	C	A	A	A	C	Y	Y	A	R	G	R	Y	Y	G	Y	Y	Y	R	T	A	C	Y	C	T	Y	C	K	G	Y	R	C	A	W	T	Y	T	R	Y	A	C	T	R	Y
Suffolk	200117463	C	A	A	T	A	T	A	M	R	Y	Y	T	W	A	A	R	C	Y	R	C	Y	Y	R	C	T	A	T	T	T	T	C	K	A	T	A	C	R	W	Y	Y	Y	A	Y	A	T	Y	R	T
Romanov	200117552	Y	R	R	G	R	Y	R	M	A	Y	Y	Y	W	R	G	R	Y	C	G	Y	Y	Y	A	T	W	C	Y	Y	T	C	C	T	R	Y	R	C	G	W	T	T	Y	A	T	A	Y	C	R	Y
Finn	200117718	Y	A	A	K	R	T	R	A	R	Y	T	T	W	A	R	A	Y	C	A	C	T	Y	G	T	A	C	Y	Y	T	C	T	G	R	Y	R	C	G	W	C	T	C	A	T	A	Y	Y	R	C
Texel	200118018	C	R	R	K	A	T	R	A	G	T	T	Y	A	R	R	A	C	C	G	Y	Y	C	R	T	W	C	C	C	Y	C	T	K	R	Y	R	Y	G	W	Y	Y	Y	R	Y	A	T	T	G	T
Rambouillet	200135902	C	A	R	G	G	Y	A	C	A	T	T	C	W	A	A	G	C	Y	G	Y	T	T	R	T	T	A	T	C	T	T	T	K	R	T	G	Y	G	W	T	Y	T	G	C	R	Y	C	R	Y
Composite	200203048	T	R	G	G	R	Y	A	M	G	T	Y	Y	W	G	R	A	C	T	R	T	Y	T	A	T	T	M	Y	Y	C	T	T	T	A	Y	R	C	A	T	T	C	T	G	T	A	C	Y	G	C
Composite	200203128	Y	A	R	G	A	Y	R	C	R	Y	C	Y	W	G	R	R	C	Y	G	Y	C	T	A	T	T	A	T	T	T	C	T	K	G	T	A	T	G	A	T	T	Y	R	Y	A	Y	Y	R	Y
Composite	200203170	Y	G	A	K	A	T	A	M	G	T	C	C	A	R	G	R	T	T	R	T	Y	Y	A	T	T	M	Y	T	C	Y	Y	K	A	Y	R	T	A	W	Y	Y	T	G	Y	R	C	C	G	T
Composite	200203179	T	A	A	G	R	Y	R	C	G	Y	C	T	T	A	A	A	C	T	R	T	T	T	R	Y	T	C	Y	C	C	C	T	G	G	Y	A	Y	R	T	Y	T	Y	G	Y	R	Y	T	R	C
Composite	200203278	Y	A	R	K	A	T	R	M	R	T	Y	C	T	G	R	R	C	Y	R	T	C	C	R	C	W	M	Y	C	C	T	Y	T	R	Y	R	Y	R	W	T	T	T	R	Y	G	Y	C	R	C
Composite	200203286	Y	A	G	G	R	Y	R	A	A	Y	Y	C	A	R	R	R	T	Y	G	T	C	Y	G	T	A	M	Y	Y	T	Y	C	T	G	Y	G	Y	R	A	Y	T	T	G	Y	G	Y	C	R	T
Composite	200203310	Y	A	R	G	R	Y	R	C	G	Y	C	C	W	R	R	R	C	Y	R	Y	Y	Y	G	T	T	M	T	C	C	T	T	T	R	C	R	Y	G	W	Y	T	C	G	Y	G	C	Y	G	C
Texel	200206039	Y	G	R	K	A	T	G	C	G	Y	C	Y	A	A	R	R	Y	Y	G	T	Y	Y	A	T	W	A	C	C	Y	C	Y	K	R	T	R	Y	G	A	Y	T	C	A	Y	R	T	C	G	Y
Texel	200206902	C	R	A	G	A	T	R	C	R	T	Y	Y	W	A	R	A	Y	Y	R	Y	Y	C	R	T	W	C	Y	C	C	C	T	K	R	Y	R	T	A	W	Y	C	C	G	Y	R	T	Y	G	C
Texel	200206903	Y	R	R	K	A	T	A	C	R	Y	Y	C	W	R	G	R	Y	T	R	Y	T	C	G	Y	W	M	C	C	C	C	Y	G	A	C	A	T	G	W	Y	C	C	R	C	R	Y	T	G	Y
Texel	200206906	C	G	R	G	A	T	R	A	A	Y	Y	T	A	A	G	A	Y	T	A	T	Y	C	R	T	W	A	T	C	Y	C	Y	G	G	T	R	C	R	W	T	C	C	A	C	R	Y	Y	G	Y
Suffolk	200210060	C	A	A	T	R	C	R	M	G	Y	Y	Y	T	A	A	R	Y	C	R	T	Y	T	A	Y	W	A	T	T	T	Y	C	T	R	C	A	Y	A	W	T	T	Y	A	Y	R	T	Y	R	Y
Suffolk	200210099	C	A	A	G	R	Y	R	M	R	C	C	C	T	A	R	A	C	C	R	Y	Y	Y	R	Y	T	M	T	T	T	T	Y	K	A	Y	A	C	A	W	T	Y	T	A	Y	R	T	Y	R	T
Suffolk	200210903	T	A	A	T	G	C	R	M	R	T	Y	Y	W	A	R	A	C	C	G	T	T	Y	R	C	W	M	T	Y	T	Y	T	K	R	Y	A	C	G	T	T	Y	C	R	Y	R	Y	C	R	Y
Suffolk	200210904	C	R	R	K	G	Y	G	M	G	Y	Y	Y	W	A	R	A	C	Y	G	Y	T	T	A	C	W	M	T	T	Y	T	C	K	R	Y	A	Y	G	A	T	C	T	R	Y	R	C	C	R	Y
Suffolk	200210915	Y	A	A	K	R	Y	A	C	R	Y	T	C	A	A	R	A	C	T	G	Y	T	T	A	Y	W	M	T	Y	C	T	Y	G	G	Y	A	T	R	A	C	T	C	R	T	R	C	Y	R	T
Dorset	200212081	T	A	A	G	R	Y	G	A	G	Y	Y	T	W	A	R	A	C	T	R	C	C	T	R	C	T	A	T	C	Y	T	Y	G	G	C	R	C	G	W	Y	C	Y	A	C	R	T	C	G	Y
Dorset	200212908	T	A	G	G	R	T	R	C	R	C	C	T	W	A	A	R	T	C	R	C	Y	Y	G	Y	W	A	T	T	Y	C	Y	K	A	Y	R	C	R	A	C	C	Y	A	T	R	C	Y	A	C
Dorset	200212909	T	A	R	G	R	C	R	M	R	C	Y	C	A	A	R	R	T	Y	R	Y	C	Y	R	C	W	A	Y	Y	T	C	Y	K	R	Y	R	Y	A	A	Y	C	Y	G	T	R	T	Y	R	C
Dorset	200212919	Y	A	R	T	R	C	G	M	R	Y	Y	T	W	A	R	R	Y	Y	G	T	C	T	A	Y	W	A	Y	T	Y	Y	Y	K	G	Y	R	Y	G	W	Y	T	T	R	Y	R	C	Y	A	C
Rambouillet	200235900	Y	A	R	G	G	Y	A	C	G	Y	C	T	A	A	A	G	Y	C	G	Y	C	T	G	Y	W	A	T	Y	Y	Y	C	G	R	Y	G	C	G	W	T	C	T	R	T	G	Y	C	R	T
Rambouillet	200235901	C	R	R	K	G	Y	A	M	A	Y	C	T	W	A	A	G	C	C	R	Y	T	T	G	Y	T	M	T	T	Y	Y	C	K	R	C	R	Y	R	T	Y	C	T	R	Y	G	C	Y	A	T
Composite	200303158	T	R	R	K	A	Y	A	M	G	C	Y	T	W	A	A	A	Y	T	G	T	T	T	A	T	T	A	T	T	T	C	Y	K	G	C	A	Y	R	T	T	Y	T	G	C	A	T	T	G	C
Composite	200303163	C	R	A	T	G	C	R	M	G	Y	T	T	W	R	G	R	C	T	R	Y	Y	T	G	Y	W	A	Y	T	Y	C	Y	T	R	Y	G	Y	A	T	Y	Y	Y	G	T	G	Y	T	G	C
Composite	200303183	Y	R	R	G	R	T	R	M	R	T	C	C	A	G	A	R	Y	C	A	T	Y	C	G	C	T	C	Y	T	T	C	Y	T	G	C	R	Y	R	A	Y	C	T	R	T	A	C	Y	G	C
Composite	200303220	C	R	R	T	A	C	A	A	R	T	C	C	A	R	R	R	T	T	G	T	Y	T	A	Y	T	A	T	Y	Y	C	Y	K	G	C	R	Y	R	T	Y	C	C	R	Y	R	Y	T	G	T
Composite	200303274	Y	A	A	K	R	Y	G	M	G	Y	Y	C	A	A	A	R	C	Y	G	Y	Y	Y	R	Y	T	M	Y	Y	Y	Y	T	G	G	Y	R	Y	G	W	Y	Y	T	G	Y	A	Y	Y	R	Y
Composite	200303289	Y	R	R	K	R	C	A	M	R	T	Y	Y	A	R	R	R	C	C	G	T	Y	Y	R	T	W	A	T	T	Y	Y	T	T	G	Y	R	Y	A	W	T	Y	Y	G	T	R	C	T	G	C
Composite	200303326	T	A	A	K	A	C	A	C	G	Y	C	Y	W	R	A	G	Y	C	G	Y	Y	C	R	Y	W	M	C	Y	C	C	Y	K	G	T	R	T	A	A	Y	Y	Y	R	Y	A	C	Y	G	C
Suffolk	200310906	Y	A	A	K	G	T	A	A	R	Y	Y	T	A	R	G	R	Y	Y	G	T	T	T	A	C	T	M	T	T	Y	C	Y	G	G	C	A	T	R	T	T	Y	Y	R	T	G	C	Y	G	Y
Romanov	200314904	C	G	R	T	A	T	A	M	A	C	T	C	A	G	R	G	C	Y	R	C	T	Y	G	T	T	C	C	T	Y	Y	T	K	R	Y	R	Y	R	T	T	T	T	R	T	A	T	Y	R	T
Finn	200316905	Y	R	R	G	A	Y	A	M	G	Y	Y	Y	W	G	A	A	Y	Y	G	C	Y	T	R	T	W	M	Y	T	Y	C	T	K	R	Y	G	C	G	W	T	Y	T	A	Y	A	C	Y	A	C
[truncated: 115 more columns]
